# Supplementary material for: Enhanced surveillance during a public health emergency in a resource-limited setting: Experience from a large dengue outbreak in Solomon Islands, 2016-17
Source: PubMed Central journal article supplement (PMC5991673; doi:10.1371/journal.pone.0198487), 2018-06-07
Supplement: pone.0198487.s001.pdf [file pone.0198487.s001.pdf]

# Solomon Island dengue outbreak and response review í stakeholder interview data collection tool

## 1. Administration

Consent to participate in interview?

Yes

No

Name

---

Date

---

Location

---

2. What was your role during the dengue outbreak? Specifically, what tasks were you responsible for?

---

---

---

---

3. In your view, how did the SI-SSS perform during the dengue outbreak? What were the major challenges faced and how, from your perspective, did the MHMS respond?

---

---

---

---

4. The system expanded to collect data from more sites very quickly. How did this go? What challenges did you see/experience? How were these managed?

---

---

---

---

5. Health facilities experienced a large increase in patients seeking care during the outbreak. What impact did this have on the health system, and how did the MHMS/hospital actions manage these?

---

---

---

---

6. Thinking specifically about your role during the outbreak, what challenges did you (and your team) face? What caused these challenges? How were they managed?

---

---

---

---

7. How did you use the information produced by the enhanced outbreak surveillance system? Did the information provided meet your information needs at the time? If not, why not?

---

---

---

---

8. In your view, how reliable was the data that was being produced? What enhanced or undermined the information produced?

9. Is there anything else you would like to add?

---

---

---

---

Thank you for your participation.
